# Supplementary material for: Effect of Muscle-Specific Fatigue on the Risk of Anterior Cruciate Ligament Injury in Females
Source: MDPI journal article supplement (doi:10.3390/app11114969), 2021-05-28
Supplement: s1 [file s1]

**Table S1. Description of markers and location of attachment**

|    | <b>Maker Location</b> | <b>Marker Type</b> |  |    | <b>Maker Location</b> | <b>Marker Type</b> |
|----|-----------------------|--------------------|--|----|-----------------------|--------------------|
| 1  | R.Acromium            | Joint              |  | 25 | R.Thigh.Front         | Tracking           |
| 2  | L.Acromium            | Joint              |  | 26 | R.Shank.Upper         | Tracking           |
| 3  | R.Elbow               | Joint              |  | 27 | R.Shank.Rear          | Tracking           |
| 4  | R.Wrist.Med           | Joint              |  | 28 | R.Shank.Front         | Tracking           |
| 5  | R.Wrist.Lat           | Joint              |  | 29 | R.Heel                | Tracking           |
| 6  | L.Elbow               | Joint              |  | 30 | R.Toe.Tip             | Tracking           |
| 7  | L.Wrist.Med           | Joint              |  | 31 | R.Midfoot.Lat         | Tracking           |
| 8  | L.Wrist.Lat           | Joint              |  | 32 | R.Midfoot.Sup         | Tracking           |
| 9  | R.ASIS                | Joint              |  | 33 | R.Toe.Lat             | Tracking           |
| 10 | L.ASIS                | Joint              |  | 34 | R.Toe.Med             | Tracking           |
| 11 | V.Sacral              | Joint              |  | 35 | L.Thigh.Upper         | Tracking           |
| 12 | R.Knee.Lat            | Joint              |  | 36 | L.Thigh.Rear          | Tracking           |
| 13 | R.Knee.Med            | Joint              |  | 37 | L.Thigh.Front         | Tracking           |
| 14 | R.Ankle.Lat           | Joint              |  | 38 | L.Shank.Upper         | Tracking           |
| 15 | R.Ankle.Med           | Joint              |  | 39 | L.Shank.Rear          | Tracking           |
| 16 | L.Knee.Lat            | Joint              |  | 40 | L.Shank.Front         | Tracking           |
| 17 | L.Knee.Med            | Joint              |  | 41 | L.Heel                | Tracking           |
| 18 | L.Ankle.Lat           | Joint              |  | 42 | L.Toe.Tip             | Tracking           |
| 19 | L.Ankle.Med           | Joint              |  | 43 | L.Midfoot.Lat         | Tracking           |
| 20 | Sternum               | Tracking           |  | 44 | L.Midfoot.Sup         | Tracking           |
| 21 | R.Bicep               | Tracking           |  | 45 | L.Toe.Lat             | Tracking           |
| 22 | L.Bicep               | Tracking           |  | 46 | L.Toe.Med             | Tracking           |
| 23 | R.Thigh.Upper         | Tracking           |  |    |                       |                    |
| 24 | R.Thigh.Rear          | Tracking           |  |    |                       |                    |

**Table S2. Results of Two way repeated measures ANOVA for kinematic and kinetic variables according to fatigue treatment.**

**Note:** QF, quadriceps; HA, hamstring; COM, center of mass; ACL, anterior cruciate ligament; aACL, anterior bundle of ACL; pACL, posterior bundle of ACL; m/s =

| Variables                                 | Time | Fatigue Treatment |                |                        | Interaction<br><i>p</i> -value | f     | ICC   | Cohen's <i>d</i> |
|-------------------------------------------|------|-------------------|----------------|------------------------|--------------------------------|-------|-------|------------------|
|                                           |      | QF fatigue        | HA fatigue     | Control (Gait 20 mins) |                                |       |       |                  |
| <i>COM velocity (m/s)</i>                 | Pre  | 4.53 ± 0.34       | 4.65 ± 0.29    | 4.56 ± 0.27            | 0.502                          | 0.707 | 0.979 | 0.248            |
|                                           | Post | 4.56 ± 0.30       | 4.66 ± 0.25    | 4.52 ± 0.27            |                                |       |       |                  |
| <i>Knee angle (°)</i>                     |      |                   |                |                        |                                |       |       |                  |
| Flexion                                   | Pre  | -35.7 ± 5.69      | -36.3 ± 5.31   | -36.7 ± 3.79           | 0.004                          | 6.683 | 0.900 | 0.938            |
|                                           | Post | -36.4 ± 5.49      | -31.1 ± 6.47*† | -36.7 ± 6.14           |                                |       |       |                  |
| Valgus                                    | Pre  | -2.89 ± 3.17      | -2.66 ± 3.96   | -1.88 ± 3.89           | 0.505                          | 0.701 | 0.958 | 0.731            |
|                                           | Post | -1.86 ± 4.70      | -1.36 ± 3.70†  | -1.52 ± 3.73           |                                |       |       |                  |
| External rotation                         | Pre  | -1.92 ± 3.92      | -1.15 ± 4.79   | -2.52 ± 4.72           | 0.445                          | 0.834 | 0.935 | 0.108            |
|                                           | Post | -2.13 ± 5.52      | -2.68 ± 4.11   | -3.88 ± 4.77           |                                |       |       |                  |
| <i>Knee joint force (N, N/kg)</i>         |      |                   |                |                        |                                |       |       |                  |
| Shear force                               | Pre  | 704 ± 137         | 736 ± 157      | 727 ± 149              | 0.422                          | 0.891 | 0.907 | 0.576            |
|                                           | Post | 650 ± 181         | 664 ± 172†     | 716 ± 136              |                                |       |       |                  |
| Normalized shear force                    | Pre  | 11.0 ± 2.13       | 11.5 ± 2.43    | 11.4 ± 2.29            | 0.436                          | 0.856 | 0.906 | 0.574            |
|                                           | Post | 10.2 ± 2.82       | 10.4 ± 2.71†   | 11.2 ± 2.09            |                                |       |       |                  |
| <i>Knee joint moment (Nm, Nm/(kg*HT))</i> |      |                   |                |                        |                                |       |       |                  |
| Extension                                 | Pre  | 154 ± 49          | 155 ± 41       | 162 ± 47               | 0.303                          | 1.245 | 0.905 | 0.582            |
|                                           | Post | 142 ± 42†         | 148 ± 44       | 152 ± 40               |                                |       |       |                  |
| Normalized extension                      | Pre  | 1.47 ± 0.47       | 1.49 ± 0.40    | 1.55 ± 0.45            | 0.280                          | 1.332 | 0.902 | 0.566            |
|                                           | Post | 1.37 ± 0.39†      | 1.42 ± 0.42    | 1.46 ± 0.38            |                                |       |       |                  |
| Adduction                                 | Pre  | 29.8 ± 23.7       | 20.9 ± 17.1    | 21.3 ± 17.9            | 0.162                          | 1.941 | 0.916 | 0.700            |
|                                           | Post | 17.2 ± 18.9†      | 20.7 ± 20.4    | 13.3 ± 17.8†           |                                |       |       |                  |
| Normalized adduction                      | Pre  | 0.29 ± 0.23       | 0.20 ± 0.17    | 0.21 ± 0.17            | 0.170                          | 1.891 | 0.918 | 0.690            |
|                                           | Post | 0.17 ± 0.18†      | 0.20 ± 0.20    | 0.13 ± 0.17†           |                                |       |       |                  |
| Internal rotation                         | Pre  | 17.8 ± 10.1       | 22.1 ± 8.5     | 20.3 ± 12.0            | 0.694                          | 0.370 | 0.899 | 0.244            |
|                                           | Post | 17.9 ± 9.0        | 20.6 ± 11.8    | 20.9 ± 12.0            |                                |       |       |                  |
| Normalized internal rotation              | Pre  | 0.17 ± 0.10       | 0.21 ± 0.08    | 0.20 ± 0.11            | 0.974                          | 0.027 | 0.880 | 0.241            |
|                                           | Post | 0.17 ± 0.09       | 0.22 ± 0.09    | 0.20 ± 0.11            |                                |       |       |                  |
|                                           |      |                   |                |                        |                                |       |       |                  |

| <i>ACL force (N, N/kg)</i>    |             |                    |             |             |       |       |       |       |
|-------------------------------|-------------|--------------------|-------------|-------------|-------|-------|-------|-------|
| Maximum aACL force            | <b>Pre</b>  | 1495 ± 197         | 1477 ± 119  | 1510 ± 103  | 0.825 | 0.194 | 0.879 | 0.080 |
|                               | <b>Post</b> | 1494 ± 173         | 1504 ± 113  | 1514 ± 147  |       |       |       |       |
| Normalized maximum aACL force | <b>Pre</b>  | 24.3 ± 4.9         | 23.9 ± 3.6  | 24.5 ± 3.8  | 0.807 | 0.216 | 0.980 | 0.100 |
|                               | <b>Post</b> | 24.3 ± 4.5         | 24.4 ± 3.8  | 24.7 ± 4.7  |       |       |       |       |
| Maximum pACL force            | <b>Pre</b>  | 941 ± 144          | 954 ± 179   | 936 ± 130   | 0.849 | 0.165 | 0.816 | 0.027 |
|                               | <b>Post</b> | 976 ± 103          | 963 ± 141   | 957 ± 107   |       |       |       |       |
| Normalized maximum pACL force | <b>Pre</b>  | 15.2 ± 2.7         | 15.4 ± 3.2  | 15.2 ± 2.5  | 0.808 | 0.214 | 0.827 | 0.046 |
|                               | <b>Post</b> | 15.8 ± 2.4         | 15.5 ± 2.2  | 15.4 ± 1.9  |       |       |       |       |
| Mean aACL force               | <b>Pre</b>  | 1198 ± 121         | 1155 ± 160  | 1154 ± 166  | 0.045 | 3.768 | 0.858 | 0.878 |
|                               | <b>Post</b> | <b>1111 ± 153†</b> | 1200 ± 121  | 1183 ± 108  |       |       |       |       |
| Normalized mean aACL force    | <b>Pre</b>  | 19.6 ± 3.0         | 19.0 ± 3.7  | 19.0 ± 4.1  | 0.053 | 3.102 | 0.931 | 0.933 |
|                               | <b>Post</b> | <b>18.3 ± 3.7†</b> | 19.7 ± 3.3  | 19.5 ± 3.4  |       |       |       |       |
| Mean pACL force               | <b>Pre</b>  | 543 ± 133          | 538 ± 118   | 573 ± 130   | 0.052 | 3.309 | 0.888 | 0.4   |
|                               | <b>Post</b> | 592 ± 96           | 577 ± 118   | 549 ± 116   |       |       |       |       |
| Normalized mean pACL force    | <b>Pre</b>  | 8.65 ± 1.93        | 9.17 ± 1.92 | 8.77 ± 2.33 | 0.048 | 3.41  | 0.885 | 0.174 |
|                               | <b>Post</b> | 9.25 ± 1.70        | 8.81 ± 1.83 | 9.57 ± 1.83 |       |       |       |       |

meter per second; °, degree; N, newton; N/Kg, newton per kilogram; Nm, newton meter; HT, height; \*, difference with post-QF fatigue treatment; †, difference with pre-treatment. Bold letter represent significant values. Effect sizes were calculated for the measured variables and interpreted according to Cohen: trivial (0–0.2), small (0.2–0.5), moderate (0.5–0.8), large (>0.8)
